# Supplementary material
Source: MDPI journal article supplement (https://www.mdpi.com/2075-163X/11/9/985)

**Figure S1.** The mind map of the P management system where the sewage sludge management hierarchy is an essential part of the Cradle-to-Cradle concept.

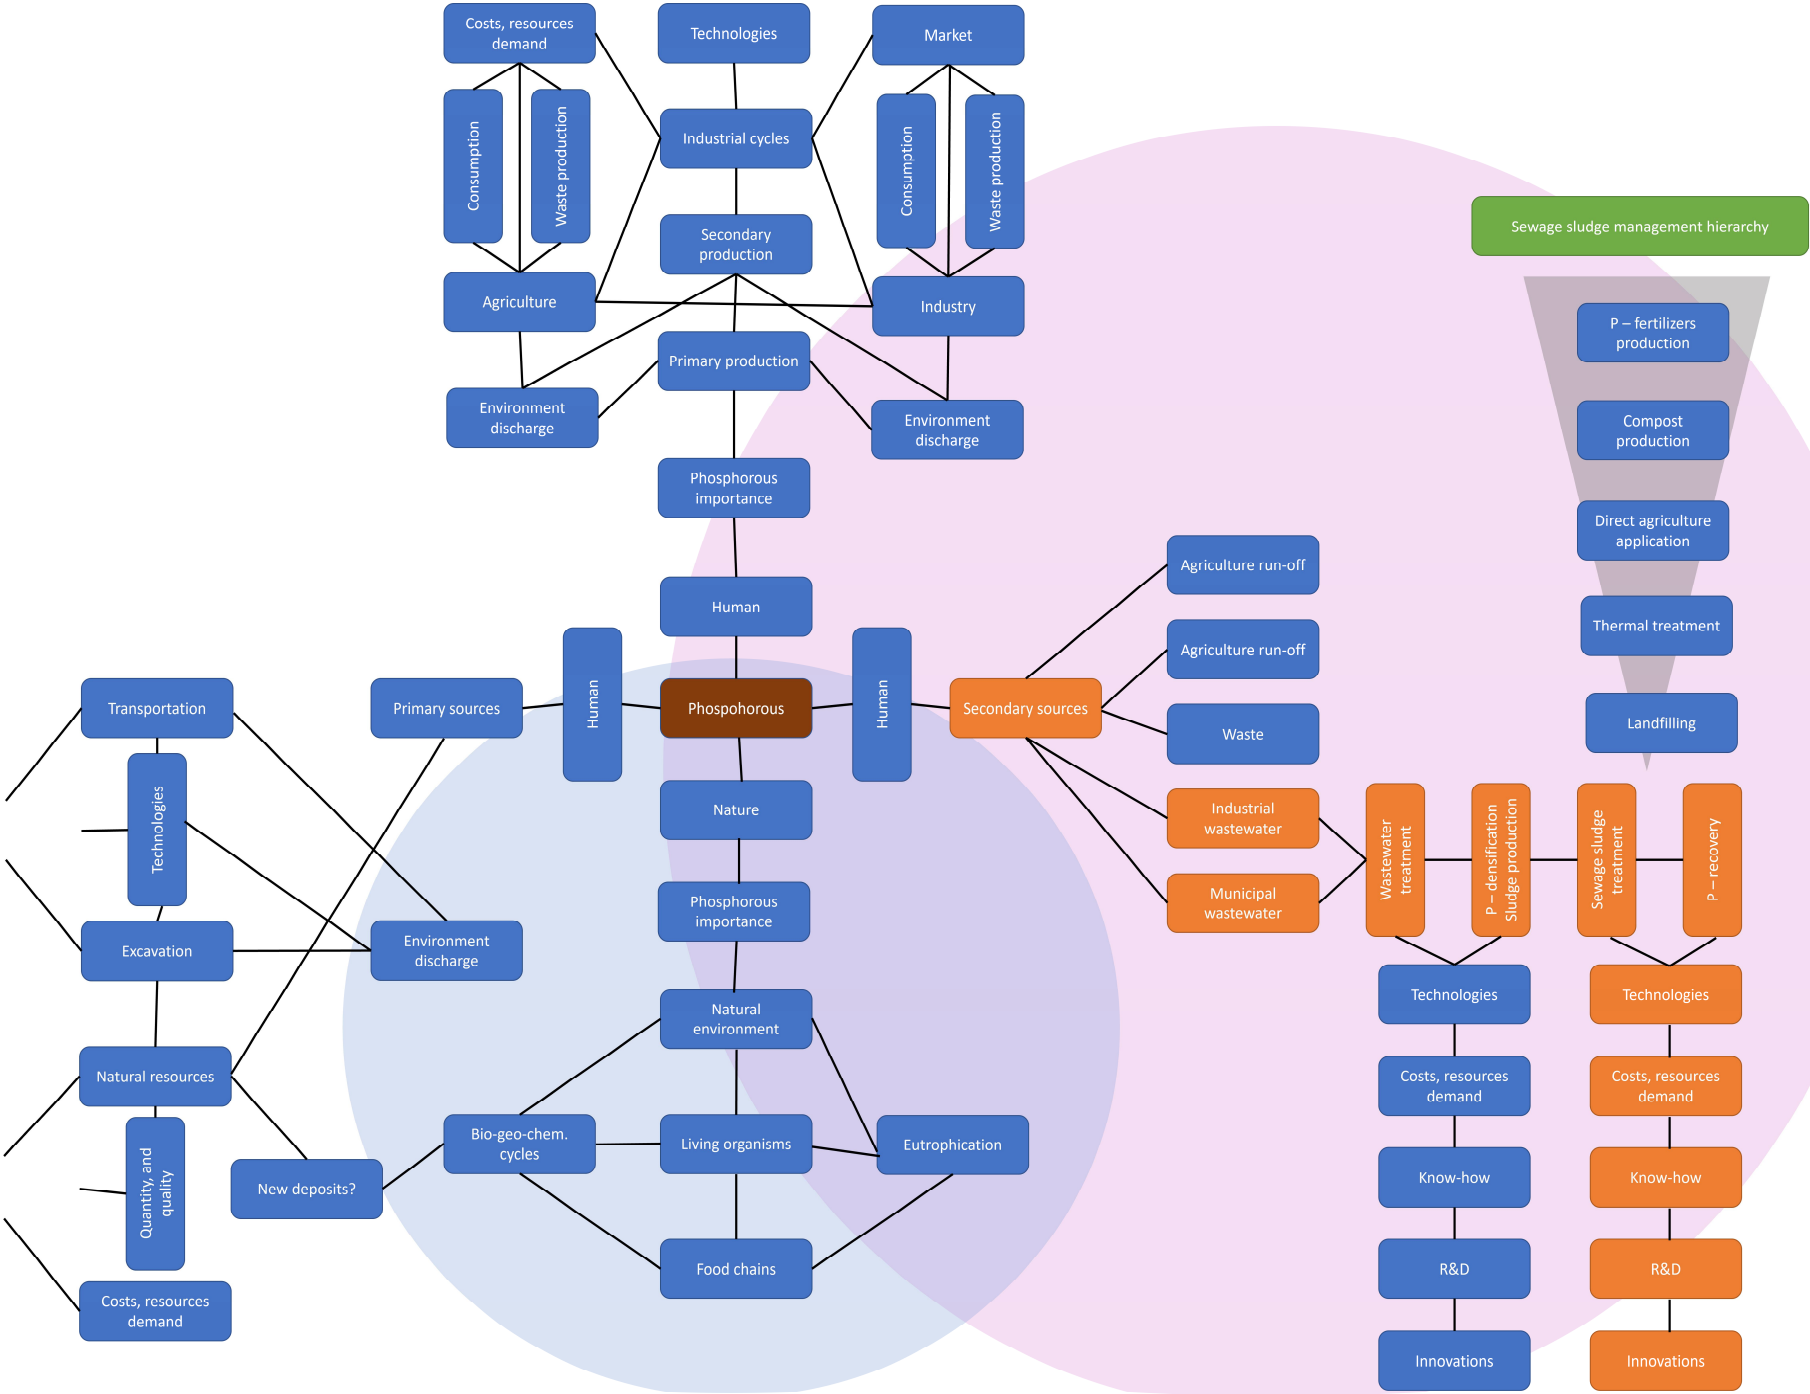

Supplement: s1 [file s1 › minerals-1357651-supplementary.pdf]
